# Supplementary material for: Ubiquitin Ligase HcPUB30 Targets HcWRKY1 to Regulate Monoterpenoids Synthesis in Hedychium coronarium
Source: Research Square preprint supplement (doi:10.21203/rs.3.rs-8230538/v1), 2025-12-11
Supplement: Supplementary file 1 [file 2626359c7b6a3d892563f420.docx]

Supplementary figures


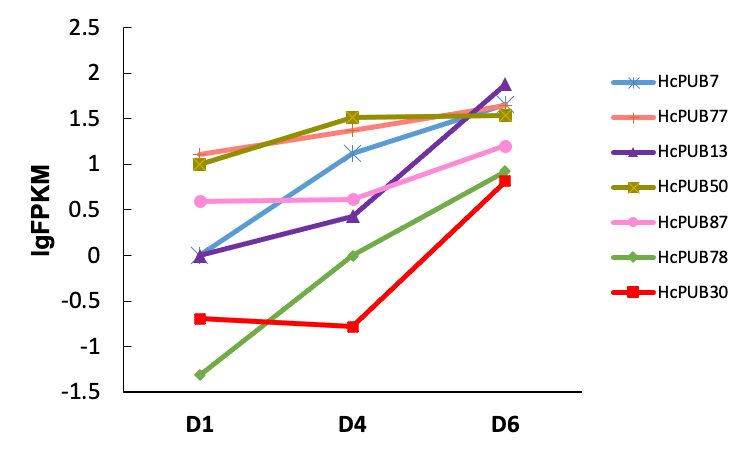


Fig. S1 Transcriptome expression level of candidate HcPUBs at different stages

D1 (bud stage), D4 (full-bloom stage), and D6 (senescence stage).


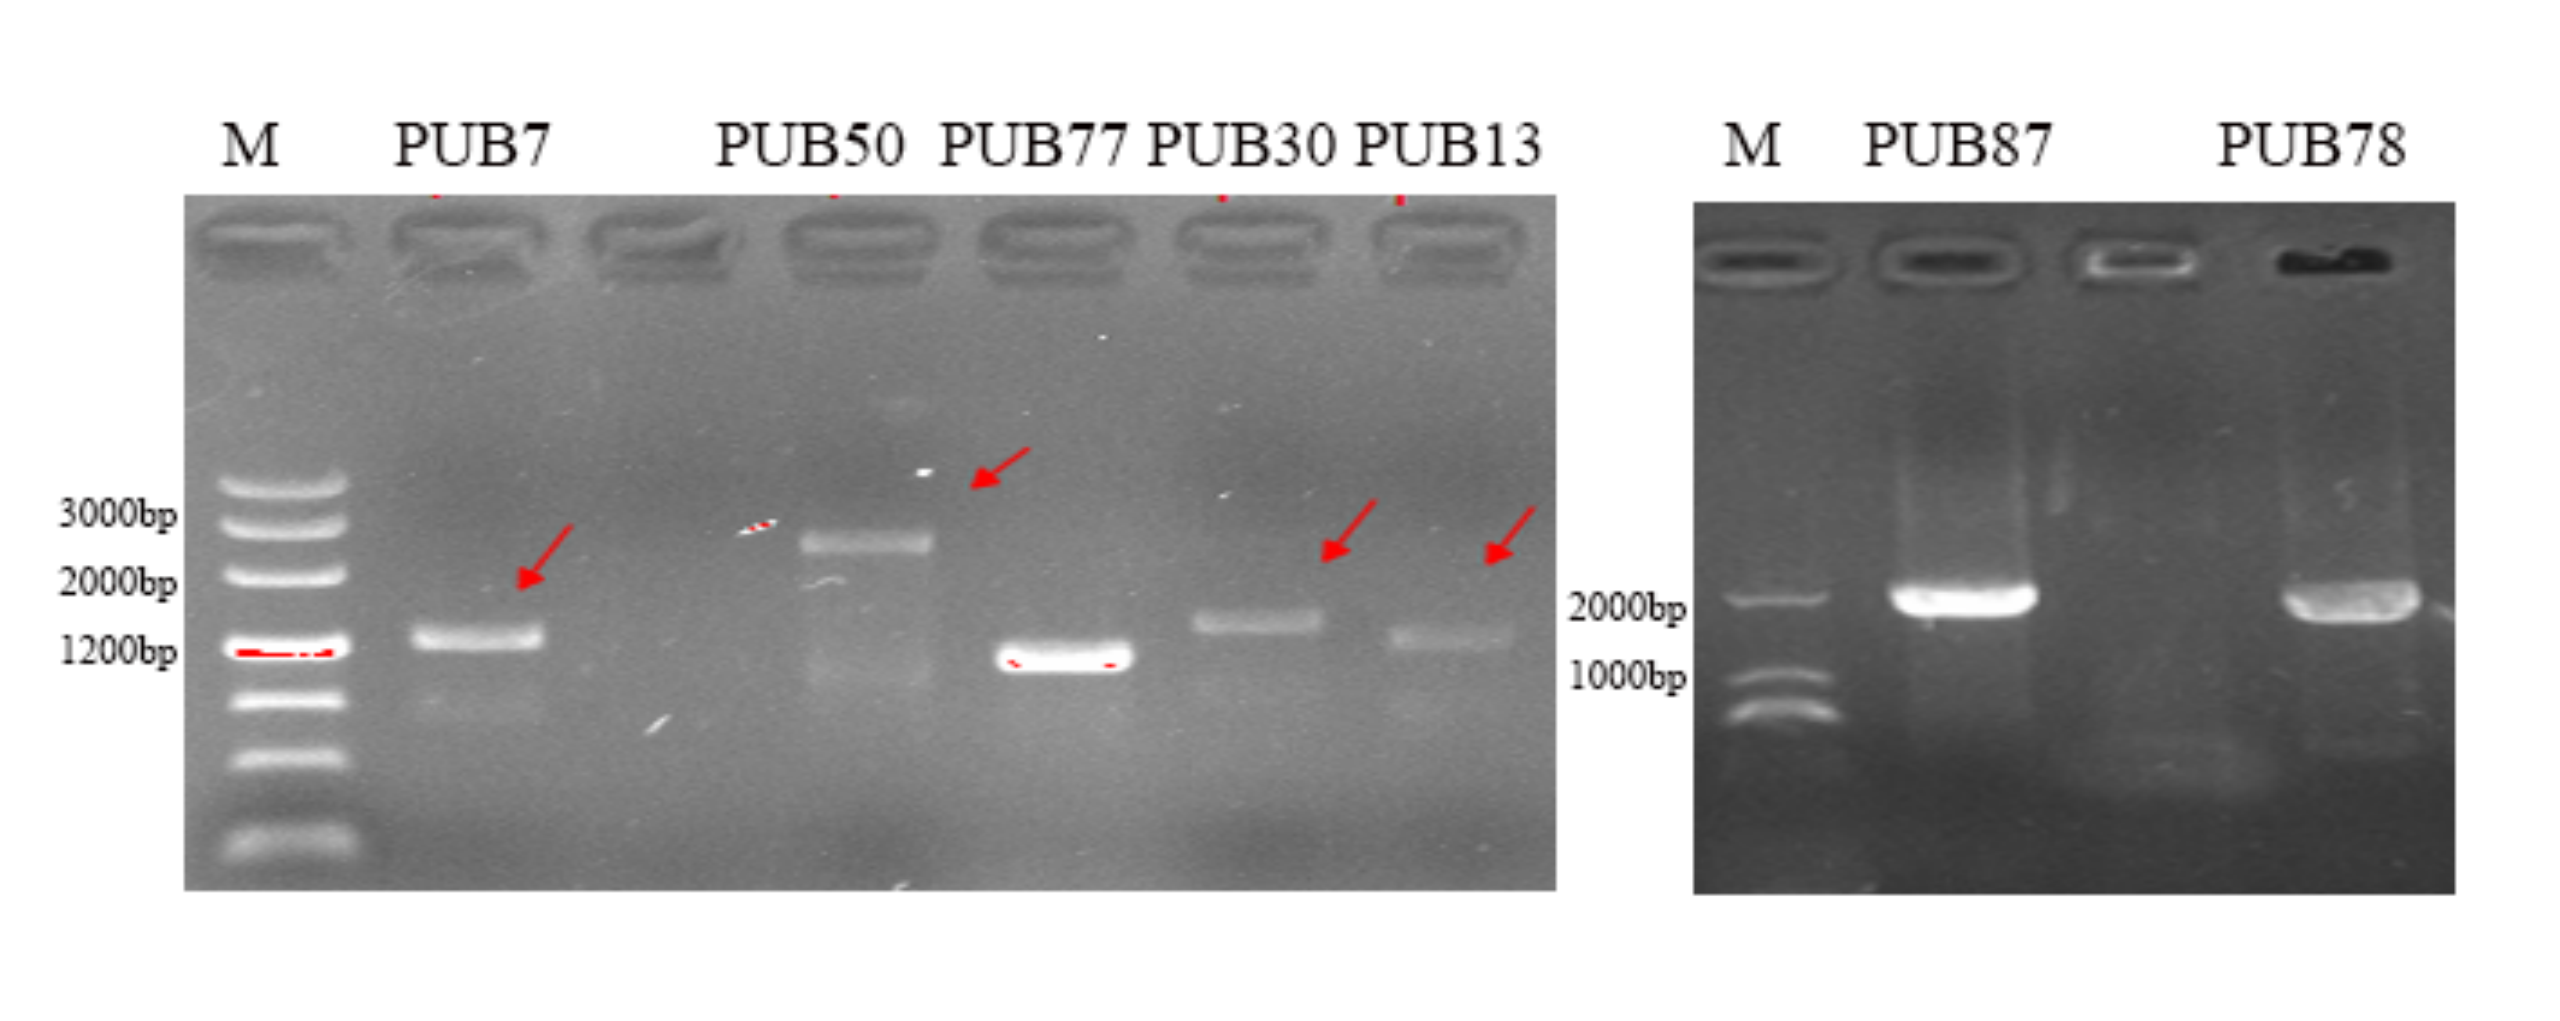


Fig. S2 Gene cloning of seven candidate HcPUBs

M: maker. Red arrows indicate the correct fragments of *HcPUB7*, *HcPUB50*, *HcPUB30* and *HcPUB13*.


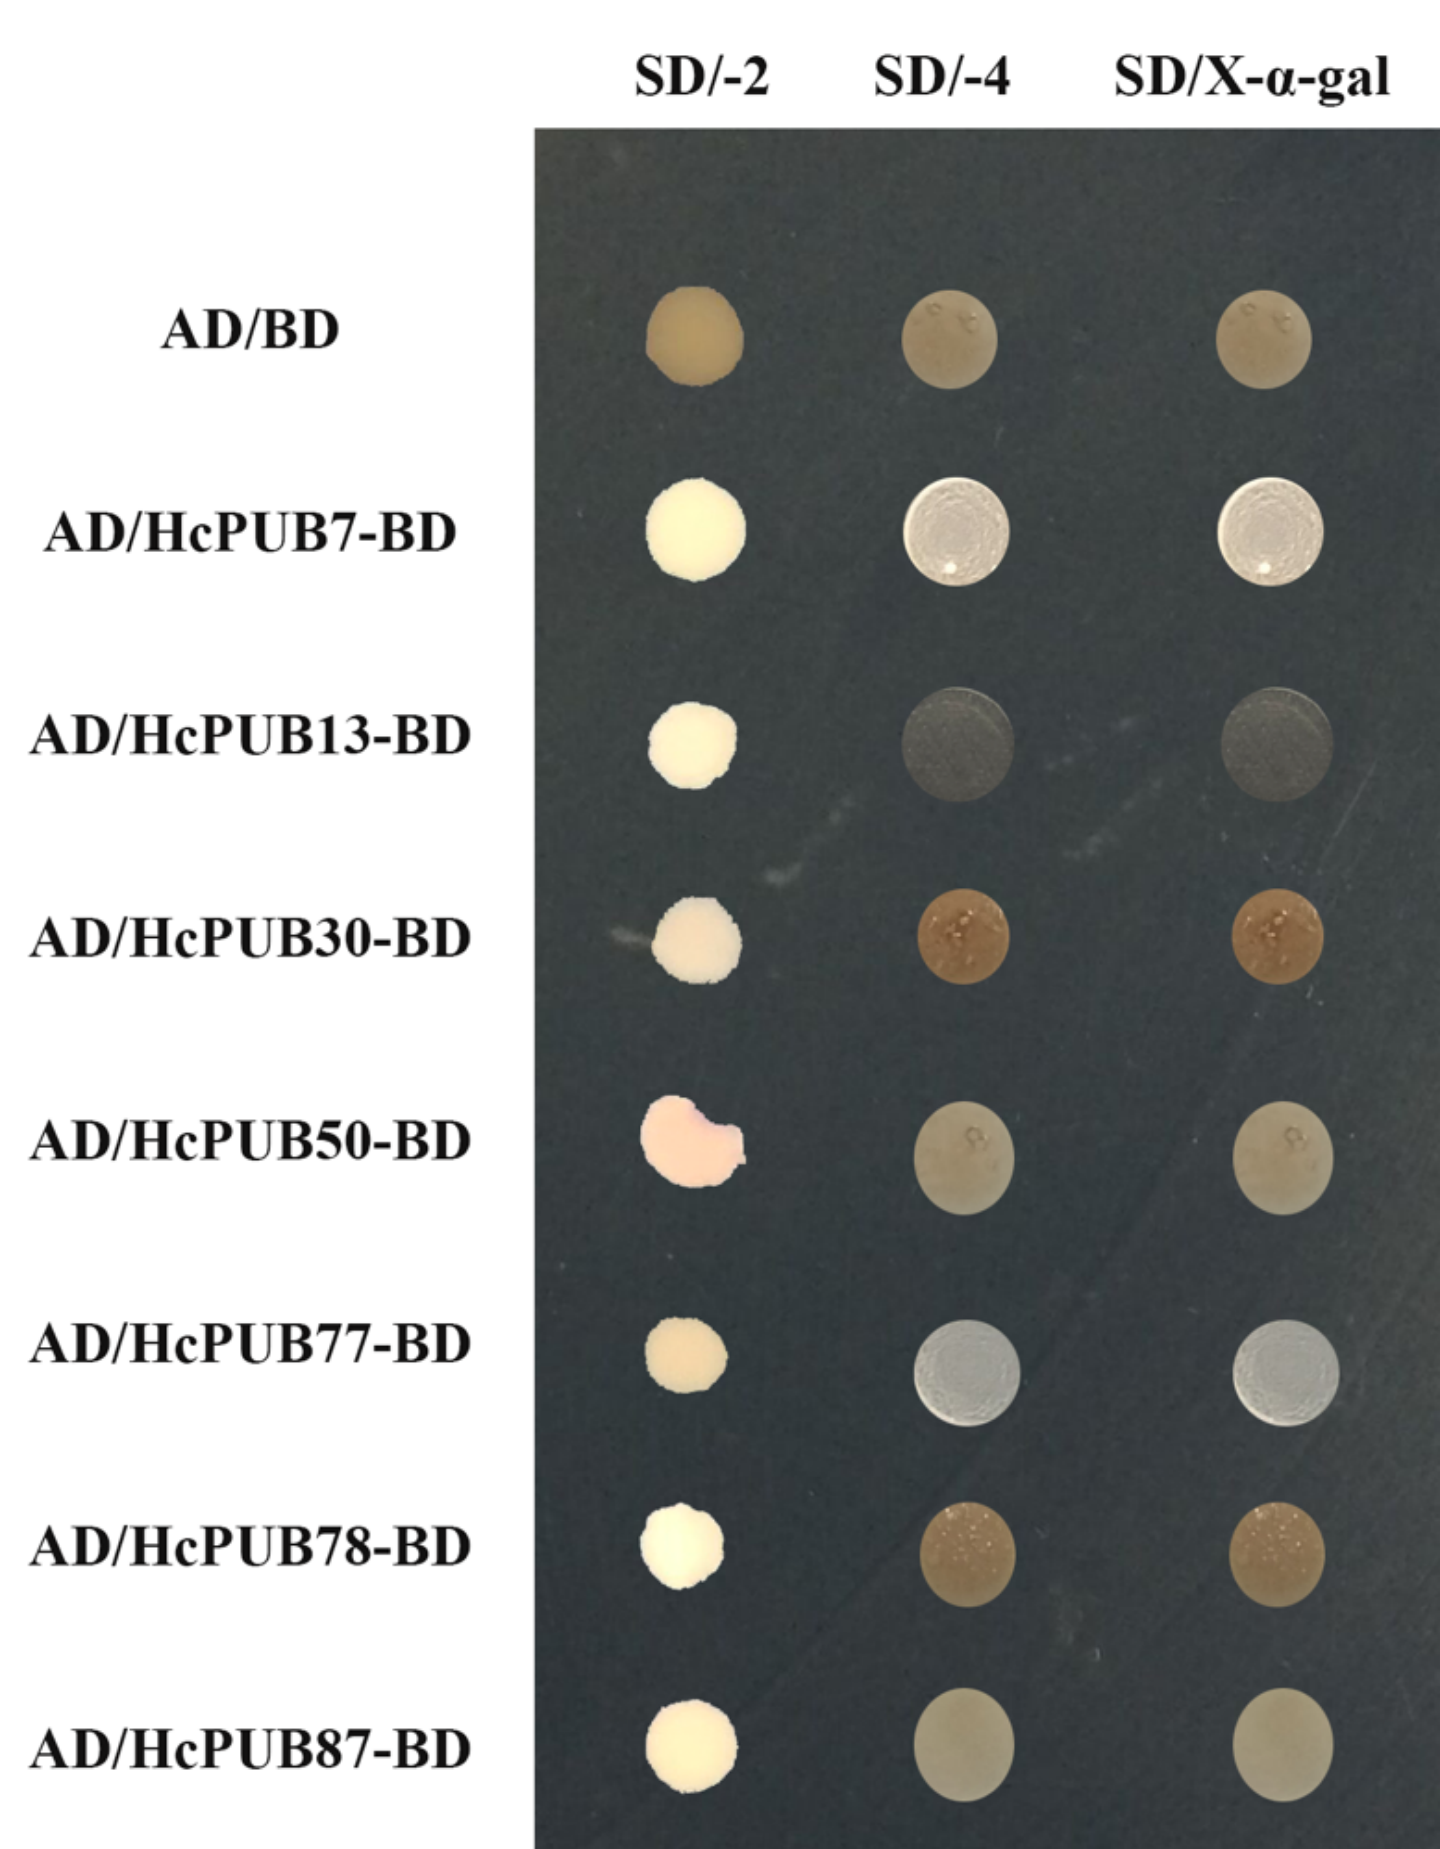


Fig. S3 Self-activation assay of seven candidate HcPUBs in yeast cell


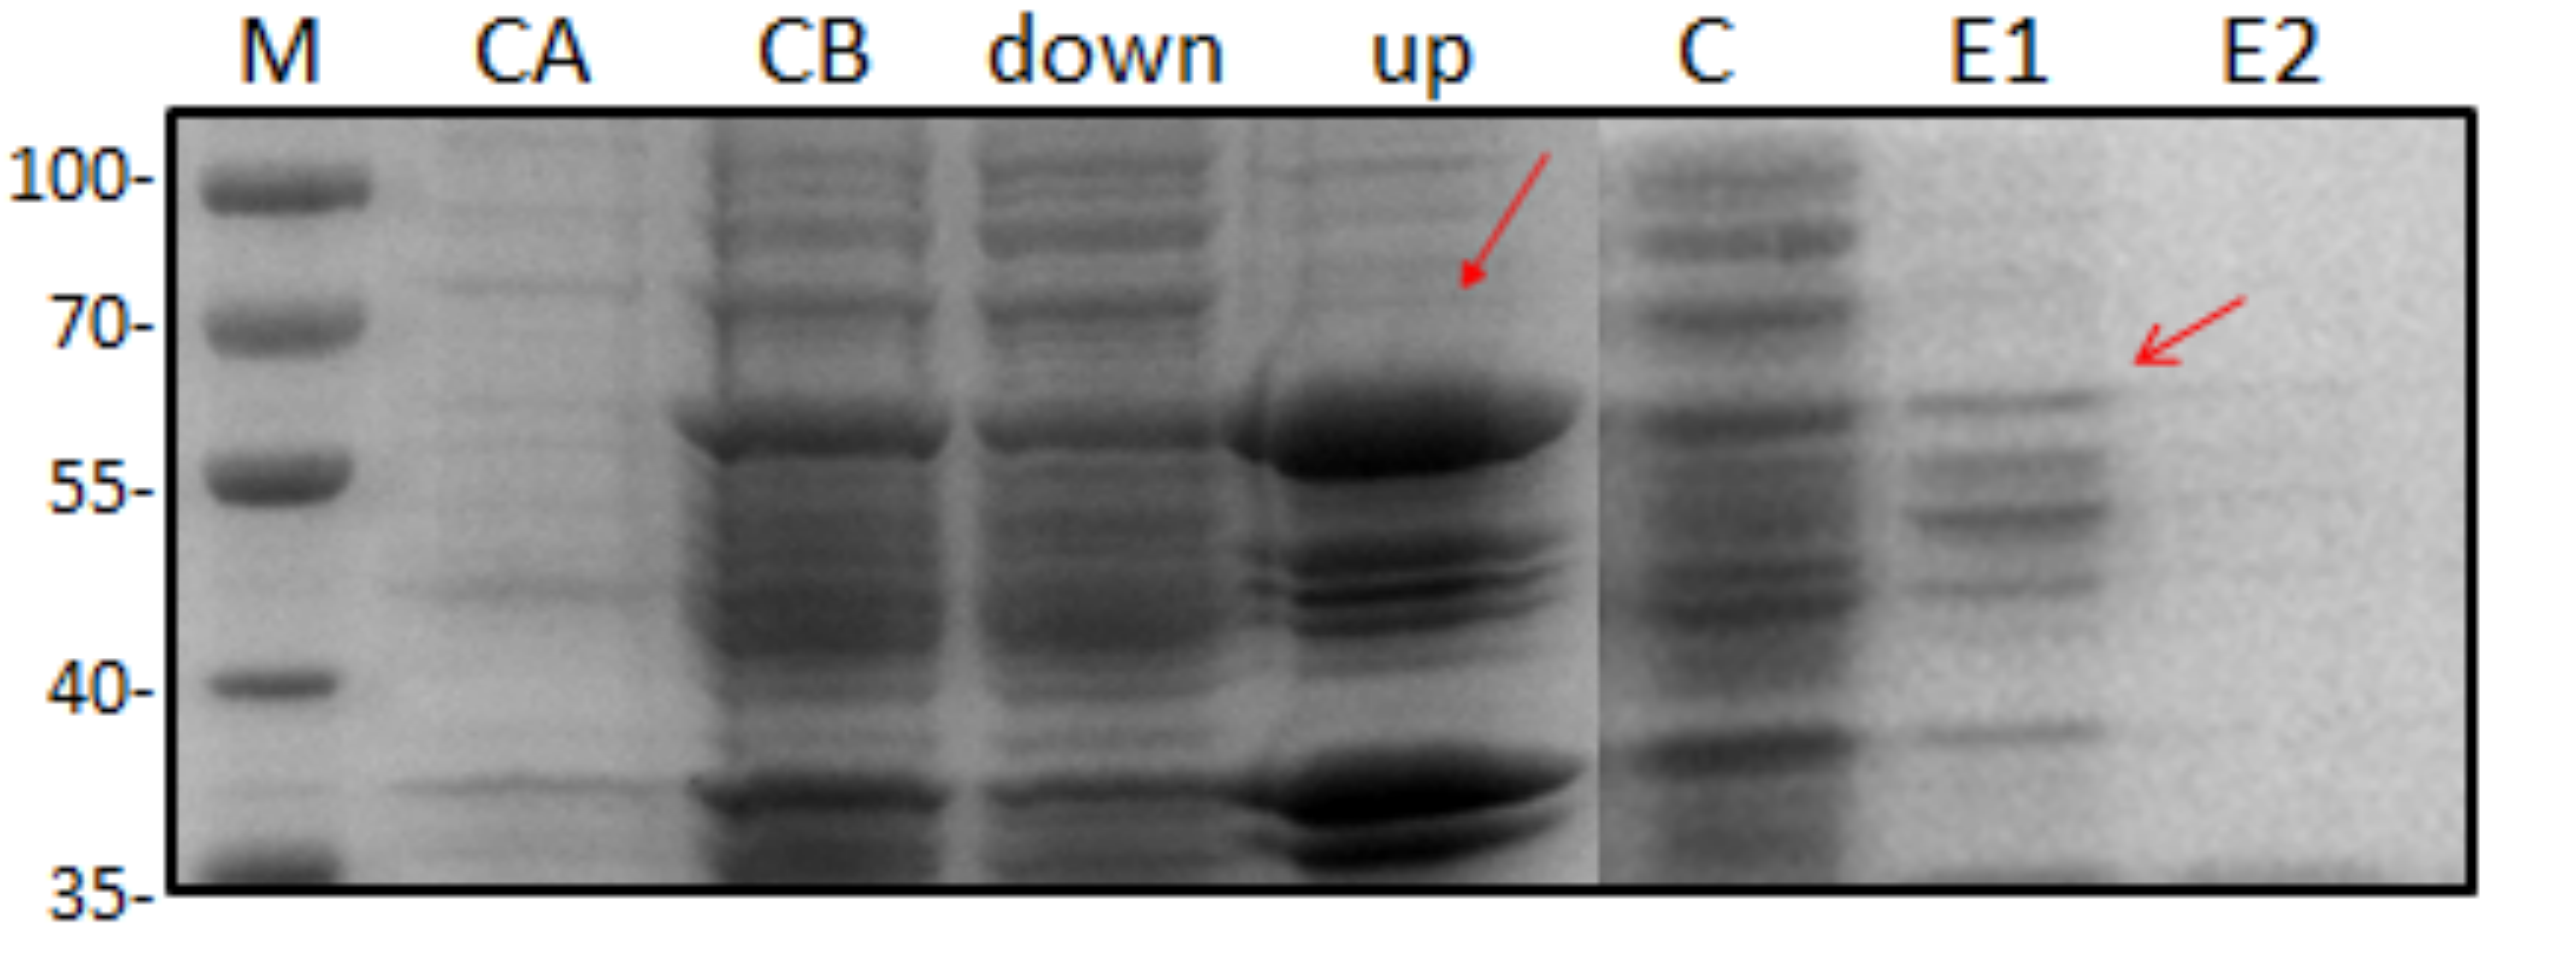


Fig. S4 GST-HcWRKY1 protein purification *in vitro*

M：marker；CA：bacterial lysate before IPTG induction；CB：bacterial lysate after IPTG induction；down：pellet after cell lysis and centrifugation；up：supernatant after cell lysis and centrifugation；C：flow-through from purification column；W1： first column wash buffer；W2：second column wash buffer；E1：first elution buffer of GST-HcWRKY1 E2：second elution buffer of GST-HcWRKY1.


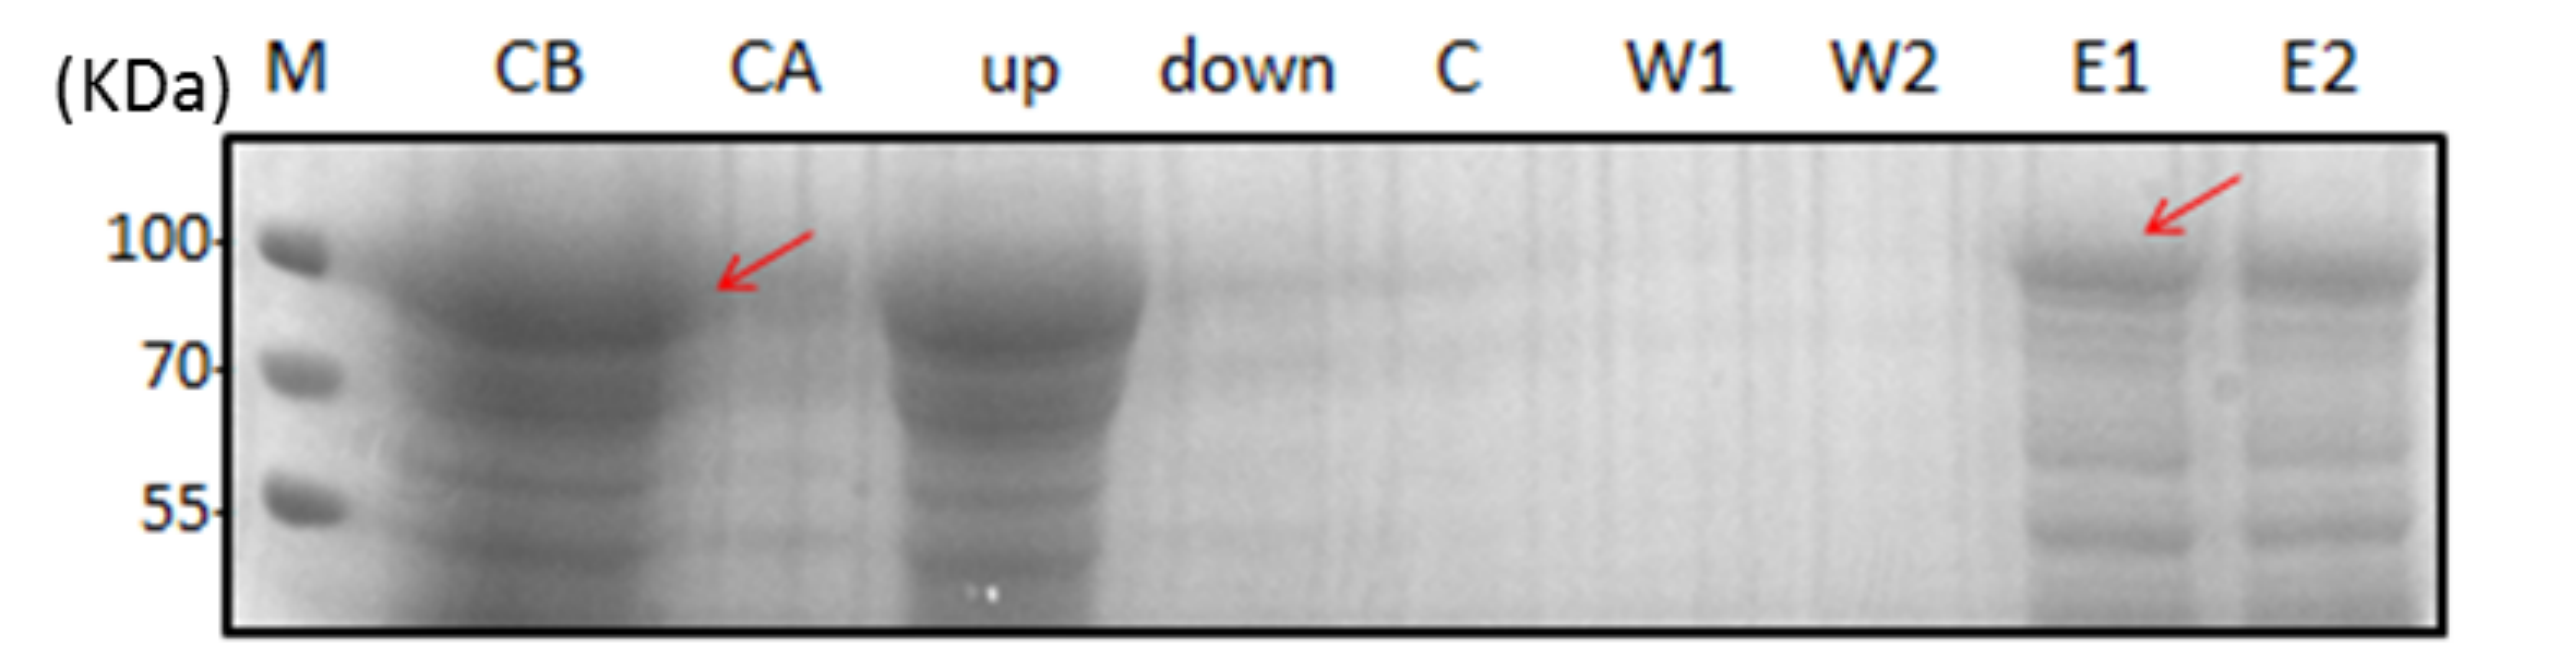


Fig. S5 MBP-HcPUB30 protein purification *in vitro*

M：marker；CA：bacterial lysate before IPTG induction；CB：bacterial lysate after IPTG induction；down：pellet after cell lysis and centrifugation；up：supernatant after cell lysis and centrifugation；C：flow-through from purification column；W1： first column wash buffer；W2：second column wash buffer；E1：first elution buffer of MBP-HcPUB30；E2：second elution buffer of MBP-HcPUB30.


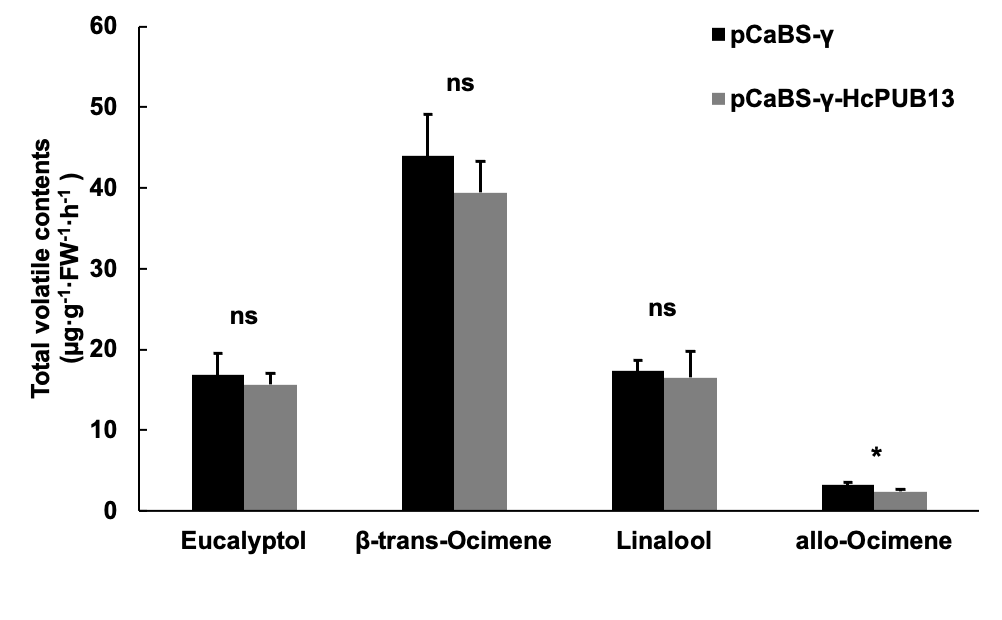


Fig. S6 Analysis of volatiles content in *HcPUB13* transient silencing and control petals

Values represent the means+*SD* (*n*=3). Significant difference between data were analyzed with Student’s *t*-test. ns, not significant; *, *P*<0.05.
