# Supplementary material for: Ubiquitin Ligase HcPUB30 Targets HcWRKY1 to Regulate Monoterpenoids Synthesis in Hedychium coronarium
Source: Research Square preprint supplement (doi:10.21203/rs.3.rs-8230538/v1), 2025-12-11
Supplement: Supplementary file 2 [file 4aeaa5d2e318254219d009eb.xlsx]

## Sheet: Table S1
Table S1 The information of primers used in this study
Name	Primer sequence	Usage
HcPUB7-F	TCTCGTTTTCAGCAATGG	Gene cloning
HcPUB7-R	TGCTACAAATTCGGATAA
HcPUB13-F	CCGGGTTTTATGGACTCC
HcPUB13-R	ATTAATGCATTAGGGTTG
HcPUB30-F	GAAGATATGGTGAATGG
HcPUB30-R	GTCAACTAAAGCACCTGC
HcPUB50-F	ATGACCTCTCCCTTCGCT
HcPUB50-R	CTGGTAACTGTTCAAGCA
HcPUB77-F	TGGCATTCAATGACGAGT
HcPUB77-R	ATTCAGTCCTCCTCACGA
HcPUB78-F	ATGGAGAAGACCCCAGTC
HcPUB78-R	TTAACTCTTGGGCCTCG
HcPUB87-F	ATGGAGGAGGGAGAAAACGA
HcPUB87-R	CTACGTATCAGTCAAAGCCGA
pGADT7-WRKY1-F	gccatggaggccagtgaattcATGGAGAACGGCGCCACC	Y2H
pGADT7-WRKY1-R	cagctcgagctcgatggatccTGTGAATAAGCTTGAGGCATCG
pGBKT7-PUB30-F	atggccatggaggccgaattcATGGTGAATGGTGATCAGAATTT
pGBKT7-PUB30-R	ccgctgcaggtcgacggatccCTAAAGCACCTGCAGCTTACTAA
pGBKT7-PUB7-F	atggccatggaggccgaattcATGGAGGAAGAAGCGCAAGTG
pGBKT7-PUB7-R	ccgctgcaggtcgacggatccCTACAAATTCGGATAAGAGATCT
pGBKT7-PUB13-F	atggccatggaggccgaattcATGGACTCCGGCGAAGCC
pGBKT7-PUB13-R	ccgctgcaggtcgacggatccTTAATGCATTAGGGTTGTTTTGA
pGBKT7-PUB50-F	atggccatggaggccgaattcATGACCTCTCCCTTCGCTTACC
pGBKT7-PUB50-R	ccgctgcaggtcgacggatccTCATAGCACAGGTACTTGTATTG
pGBKT7-PUB77-F	atggccatggaggccgaattcATGACGAGTAGAATTTACTTTGT
pGBKT7-PUB77-R	ccgctgcaggtcgacggatccTCAGTCCTCCTCACGACGTGG
pGBKT7-PUB78-F	atggccatggaggccgaattcATGGAGAAGACCCCAGTC
pGBKT7-PUB78-R	ccgctgcaggtcgacggatccACTCTTGGGCCTCGCTA
pGBKT7-PUB87-F	atggccatggaggccgaattcATGGAGGAGGGAGAAAAC
pGBKT7-PUB87-R	ccgctgcaggtcgacggatccCGTATCAGTCAAAGCCGA
MBP-PUB30-F	tcaccatcaccacgcgaattcGATGGTGAATGGTGATCAGAA	In vitro ubiquitin
MBP-PUB30-R	gcttgtcgactcgagggatccAAGCACCTGCAGCTTACT
GST-WRKY1-F	GAATTCCCGGGTCGACATGGAGAACGGCGCCACC
GST-WRKY1-R	GGCCGCTCGAGTCGACTGTGAATAAGCTTGAGGCATCG
pEAQ-GFP-PUB30-F	tattctgcccaaattcgcgaccggtATGGTGAATGGTGATCAGAATTTT	In vivo ubiquitin
pEAQ-GFP-PUB30-R	aaagttcttctcctttgctagtCATAAGCACCTGCAGCTTACTAAGATG
pEAQ-HIS-WRKY1-F	ctgcccaaattcgcgaccggtATGGAGAACGGCGCCACC
pEAQ-HIS-WRKY1-R	accagagttaaaggcctcgagTGTGAATAAGCTTGAGGCATCG
pEAQ-GFP-PUB30-F	tattctgcccaaattcgcgaccggtATGGTGAATGGTGATCAGAATTTT	Subcelluler localization
pEAQ-GFP-PUB30-R	aaagttcttctcctttgctagtCATAAGCACCTGCAGCTTACTAAGATG
qT-PUB30-F	CCGCAGCAGCCATTTTTAG	qRT-PCR
qT-PUB30-R	GCAGCATCCTTCTTTCCCC
pCa-γb-PUB30-F	AAGGAAGTTTAAATGGCTGGTGCTATTG	VIGS
pCa-γb-PUB30-R	AACCACCACCACCGTGTTGCAGCATCCTTC
pCa-γb-PUB13-F	AAGGAAGTTTAAGAGGCAGTGCGGGTGCTG
pCa-γb-PUB13-R	AACCACCACCACCGTTAACGTAGACATGGACGAC
Pet-PUB30-F	gccatggctgatatcggatccATGGTGAATGGTGATCAGAA	Prokaryotic expression
Pet-PUB30-R	gcaagcttgtcgacggagctcAAGCACCTGCAGCTTACT

## Sheet: Table S2
Table S2 The chromasome information about 96 HcPUBs
Gene ID	Chromosome Location	Start position	End position	Endpoint	Gene Name
evm.model.scaf_358.58	Hic_asm_0	314873	324234	+	PUB1
evm.model.scaf_134.117	Hic_asm_0	4487652	4489732	+	PUB2
evm.model.scaf_443.12	Hic_asm_0	15588768	15590936	+	PUB3
evm.model.scaf_47.64	Hic_asm_1	1314176	1319407	+	PUB4
evm.model.scaf_781.7	Hic_asm_1	23423739	23445030	+	PUB5
evm.model.scaf_14.46.1	Hic_asm_1	58356541	58362652	-	PUB6
evm.model.scaf_441.35	Hic_asm_2	584416	586095	+	PUB7
evm.model.scaf_118.94	Hic_asm_2	1338184	1339855	-	PUB8
evm.model.scaf_204.104	Hic_asm_2	2415945	2420700	+	PUB9
evm.model.scaf_204.36	Hic_asm_2	3217820	3222720	-	PUB10
evm.model.scaf_284.20	Hic_asm_2	5780735	5782348	+	PUB11
evm.model.scaf_94.99	Hic_asm_2	40828485	40831894	+	PUB12
evm.model.scaf_295.46	Hic_asm_3	996189	997379	-	PUB13
evm.model.scaf_295.56	Hic_asm_3	1046939	1050633	+	PUB14
evm.model.scaf_322.79	Hic_asm_3	4115673	4118734	-	PUB15
evm.model.scaf_62.58	Hic_asm_3	6858978	6860275	-	PUB16
evm.model.scaf_400.5	Hic_asm_3	11237511	11254031	+	PUB17
evm.model.scaf_765.7	Hic_asm_3	65105609	65108331	-	PUB18
evm.model.scaf_361.110	Hic_asm_3	65617684	65619288	+	PUB19
evm.model.scaf_361.79	Hic_asm_3	65903604	65904767	-	PUB20
evm.model.scaf_116.190	Hic_asm_3	67930270	67931759	-	PUB21
evm.model.scaf_484.8	Hic_asm_4	522161	524020	+	PUB22
evm.model.scaf_104.124	Hic_asm_4	835124	836969	+	PUB23
evm.model.scaf_113.86	Hic_asm_4	3528333	3534776	+	PUB24
evm.model.scaf_448.7	Hic_asm_4	7580551	7590311	-	PUB25
evm.model.scaf_107.71	Hic_asm_4	7691506	7692751	-	PUB26
evm.model.scaf_435.4	Hic_asm_4	20938510	20980528	+	PUB27
evm.model.scaf_572.56	Hic_asm_4	53780515	53781923	-	PUB28
evm.model.scaf_550.52	Hic_asm_5	1586666	1593490	-	PUB29
evm.model.scaf_1123.1	Hic_asm_5	17365432	17370568	+	PUB30
evm.model.scaf_788.19	Hic_asm_5	49467349	49473370	-	PUB31
evm.model.scaf_96.180	Hic_asm_5	53886180	53888241	+	PUB32
evm.model.scaf_3.73	Hic_asm_6	608044	613430	-	PUB33
evm.model.scaf_3.276	Hic_asm_6	2214486	2222261	+	PUB34
evm.model.scaf_3.382	Hic_asm_6	3861907	3863070	+	PUB35
evm.model.scaf_404.15	Hic_asm_6	7052016	7054658	-	PUB36
evm.model.scaf_56.108	Hic_asm_7	2329307	2334477	-	PUB37
evm.model.scaf_56.39	Hic_asm_7	2986676	2988933	-	PUB38
evm.model.scaf_140.43	Hic_asm_7	46244714	46249062	-	PUB39
evm.model.scaf_247.27	Hic_asm_7	47643551	47644417	+	PUB40
evm.model.scaf_885.22	Hic_asm_8	170140	173389	+	PUB41
evm.model.scaf_102.173	Hic_asm_8	1764234	1765625	-	PUB42
evm.model.scaf_41.93	Hic_asm_8	5664532	5668000	+	PUB43
evm.model.scaf_29.32	Hic_asm_8	13346765	13375901	+	PUB44
evm.model.scaf_868.29	Hic_asm_9	1881225	1882553	+	PUB45
evm.model.scaf_402.16	Hic_asm_9	4600078	4601394	-	PUB46
evm.model.scaf_1025.20	Hic_asm_9	4905315	4911210	+	PUB47
evm.model.scaf_128.124	Hic_asm_9	5398576	5400168	+	PUB48
evm.model.scaf_806.11	Hic_asm_9	12447701	12457489	-	PUB49
evm.model.scaf_375.58	Hic_asm_10	4935253	4938595	-	PUB50
evm.model.scaf_260.46	Hic_asm_10	13374227	13376163	-	PUB51
evm.model.scaf_339.52	Hic_asm_10	41658403	41663609	-	PUB52
evm.model.scaf_843.2	Hic_asm_10	43664321	43676748	+	PUB53
evm.model.scaf_66.37	Hic_asm_10	45078243	45079493	-	PUB54
evm.model.scaf_28.236	Hic_asm_10	49780407	49786096	-	PUB55
evm.model.scaf_28.298	Hic_asm_10	50225082	50225771	-	PUB56
evm.model.scaf_169.12	Hic_asm_11	38184437	38188148	+	PUB57
evm.model.scaf_169.8	Hic_asm_11	38247278	38248282	-	PUB58
evm.model.scaf_326.70	Hic_asm_13	520149	521322	+	PUB59
evm.model.scaf_495.61	Hic_asm_13	1326815	1328071	-	PUB60
evm.model.scaf_225.49	Hic_asm_13	4344610	4345941	+	PUB61
evm.model.scaf_57.144	Hic_asm_13	8682377	8697645	+	PUB62
evm.model.scaf_18.39	Hic_asm_13	10310767	10312132	-	PUB63
evm.model.scaf_18.55	Hic_asm_13	10514844	10516157	-	PUB64
evm.model.scaf_18.82	Hic_asm_13	10832383	10835547	+	PUB65
evm.model.scaf_346.32	Hic_asm_13	13053722	13060237	-	PUB66
evm.model.scaf_72.21	Hic_asm_13	41480201	41481773	+	PUB67
evm.model.scaf_812.41	Hic_asm_13	43296850	43301230	-	PUB68
evm.model.scaf_277.28	Hic_asm_14	734014	735311	+	PUB69
evm.model.scaf_277.35	Hic_asm_14	826872	829760	+	PUB70
evm.model.scaf_236.6	Hic_asm_14	24770196	24771767	-	PUB71
evm.model.scaf_132.173	Hic_asm_14	34528491	34539155	-	PUB72
evm.model.scaf_901.22.1	Hic_asm_15	260207	267626	-	PUB73
evm.model.scaf_311.68	Hic_asm_15	803200	804450	-	PUB74
evm.model.scaf_774.1	Hic_asm_15	10115218	10115898	-	PUB75
evm.model.scaf_189.96	Hic_asm_16	3585234	3586598	-	PUB76
evm.model.scaf_189.138	Hic_asm_16	3844902	3847431	-	PUB77
evm.model.scaf_259.73	Hic_asm_16	7173149	7175694	-	PUB78
evm.model.scaf_1.114	000000F_arrow_pilon	620943	625248	+	PUB79
evm.model.scaf_1.136	000000F_arrow_pilon	823835	825412	+	PUB80
evm.model.scaf_1.473	000000F_arrow_pilon	3660619	3665003	-	PUB81
evm.model.scaf_63.111	000067F_arrow_pilon	1650227	1651594	-	PUB82
evm.model.scaf_65.37	000069F_arrow_pilon	456113	459297	+	PUB83
evm.model.scaf_65.105	000069F_arrow_pilon	1416720	1419714	-	PUB84
evm.model.scaf_172.72	000189F_arrow_pilon	509942	512784	-	PUB85
evm.model.scaf_191.40	000212F_arrow_pilon	586188	589179	-	PUB86
evm.model.scaf_224.84	000248F_arrow_pilon	834458	839076	+	PUB87
evm.model.scaf_308.45	000345F_arrow_pilon	325999	328129	+	PUB88
evm.model.scaf_308.51	000345F_arrow_pilon	382119	392716	-	PUB89
evm.model.scaf_327.45	000371F_arrow_pilon	264666	265871	-	PUB90
evm.model.scaf_397.59	000454F_arrow_pilon	402298	404078	-	PUB91
evm.model.scaf_462.23	000544F_arrow_pilon	132104	135914	+	PUB92
evm.model.scaf_911.1	001245F_arrow_pilon	949	3646	+	PUB93
evm.model.scaf_958.36	001363F_arrow_pilon	249405	253508	-	PUB94
evm.model.scaf_1063.11	001684F_arrow_pilon	162238	166590	+	PUB95
evm.model.scaf_1201.3	002482F_arrow_pilon	19312	20775	-	PUB96
