# Supplementary material for: Ubiquitin Ligase HcPUB30 Targets HcWRKY1 to Regulate Monoterpenoids Synthesis in Hedychium coronarium
Source: Research Square preprint supplement (doi:10.21203/rs.3.rs-8230538/v1), 2025-12-11
Supplement: Supplementary file 3 [file 4e067da0b515153ffaa39b94.docx]

supplementary-original figures


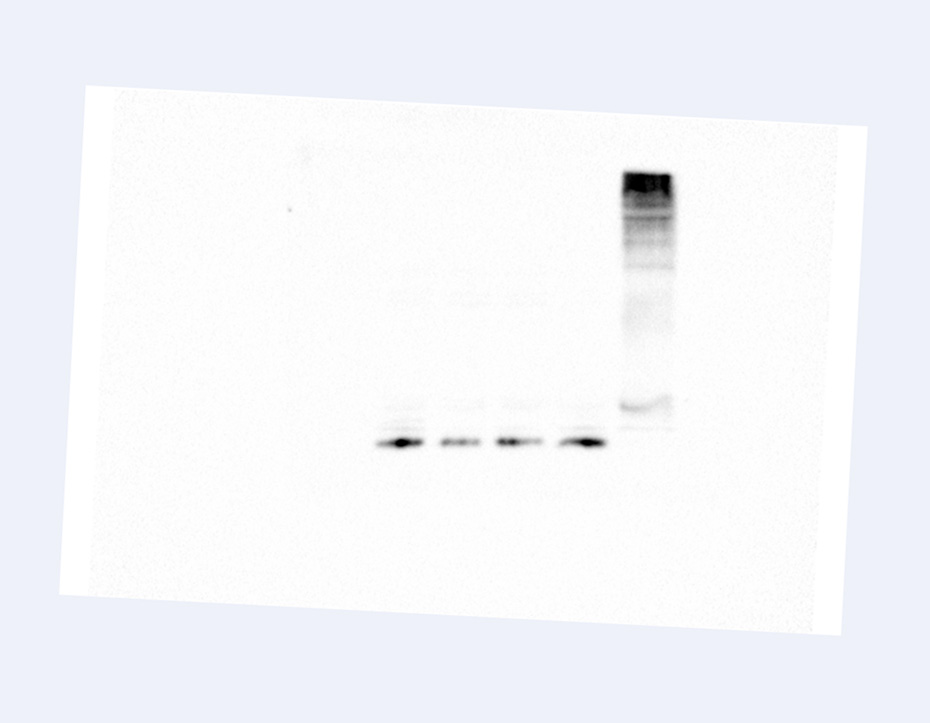


Fig.s1 original figure used in figure 7A (Anti-ubiquitin)


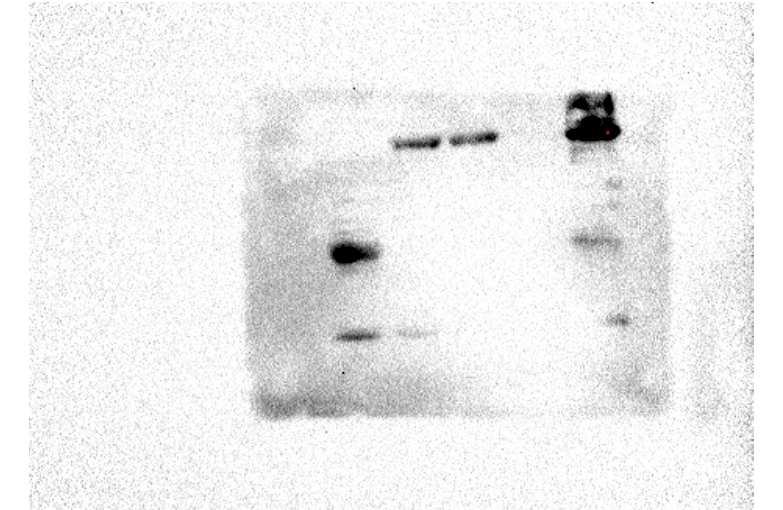


Fig.s2 original figure used in figure 7A (Anti-MBP)


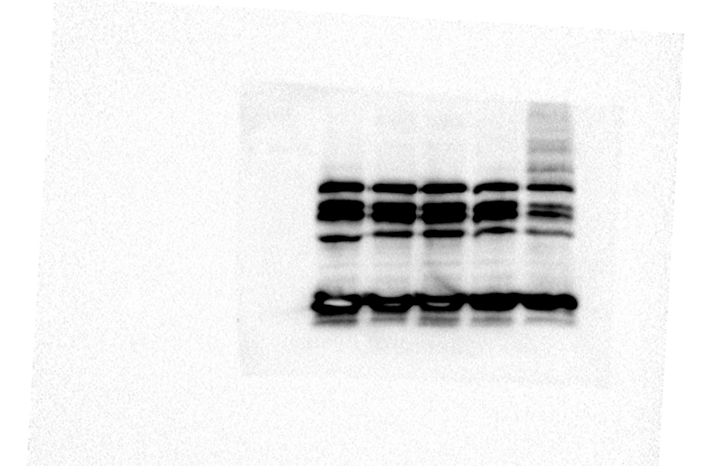


Fig.s3 original figure used in figure 7A (Anti-GST)


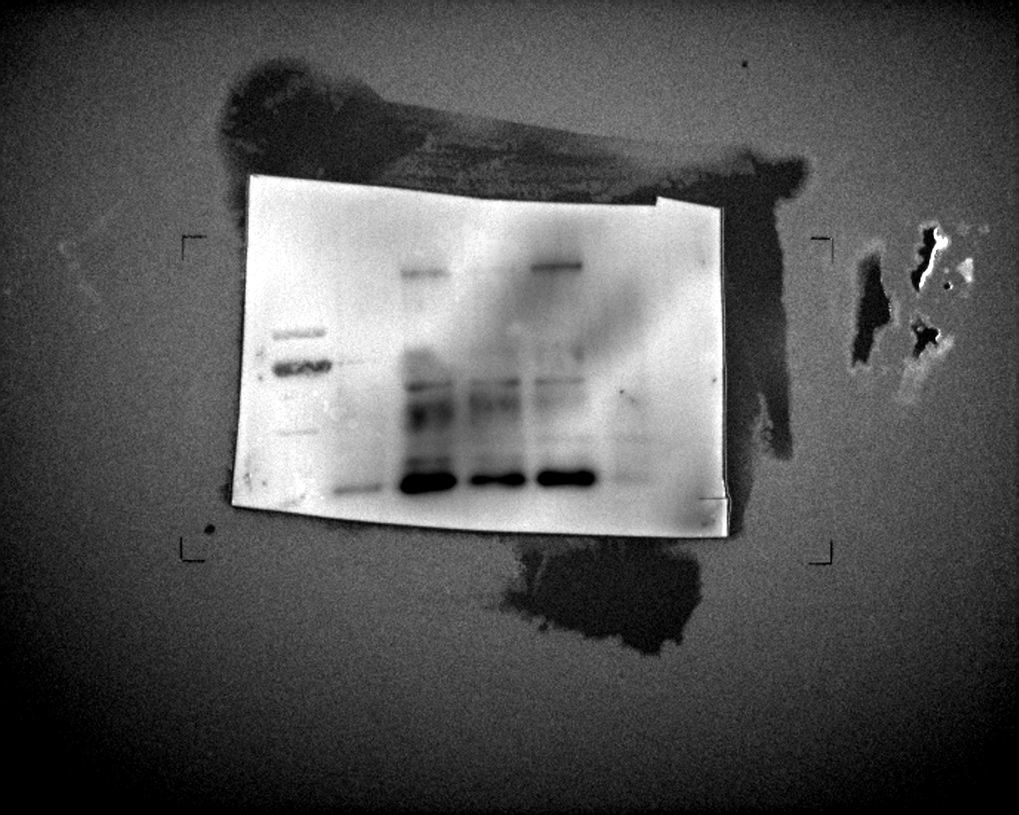


Fig.s4 original figure used in figure 7C (Anti-His)


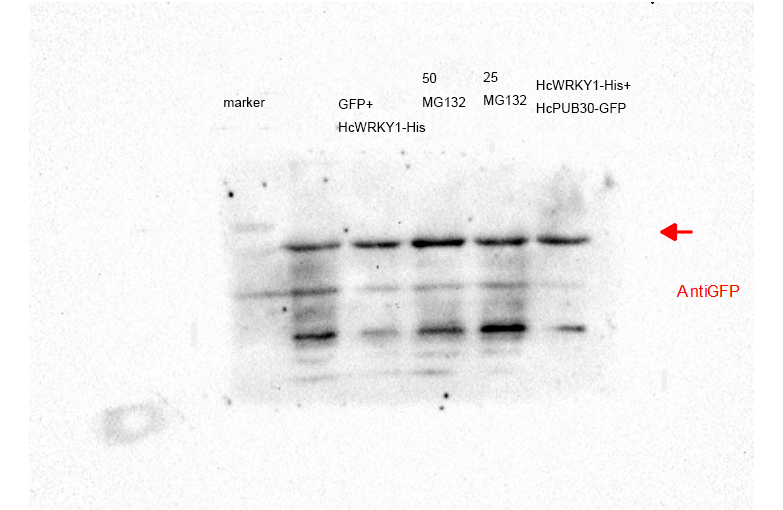


Fig.s5 original figure used in figure 7C (Anti-GFP)


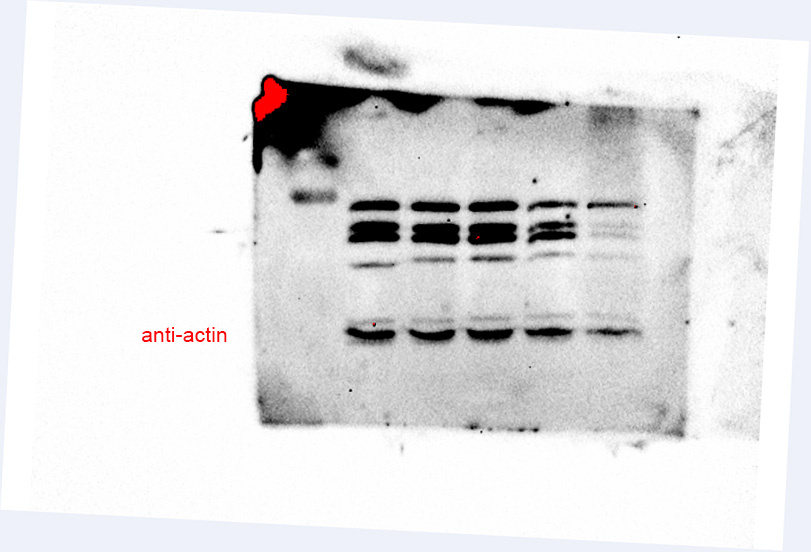


Fig.s6 original figure used in figure 7C (Anti-actin)


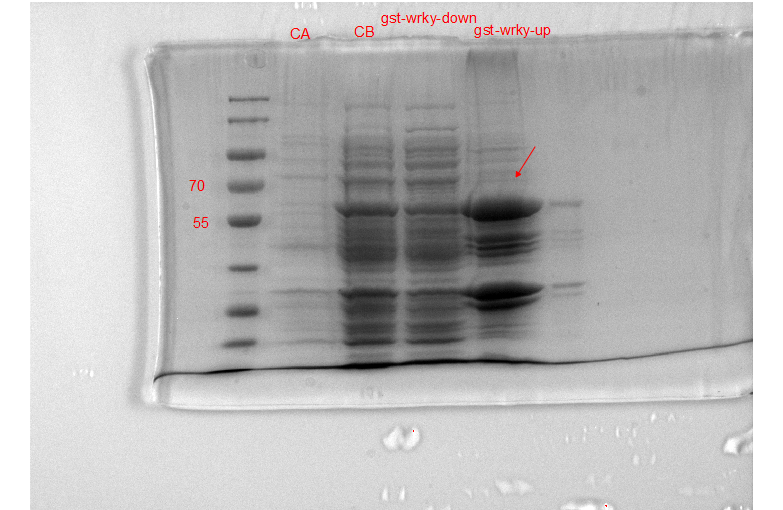


Fig.s7 original figure used in supplementary figure S4

CA：bacterial lysate before IPTG induction；CB：bacterial lysate after IPTG induction；down：pellet after cell lysis and centrifugation；up：supernatant after cell lysis and centrifugation；C：flow-through from purification column； E1：first elution buffer of GST-HcWRKY1 E2：second elution buffer of GST-HcWRKY1.


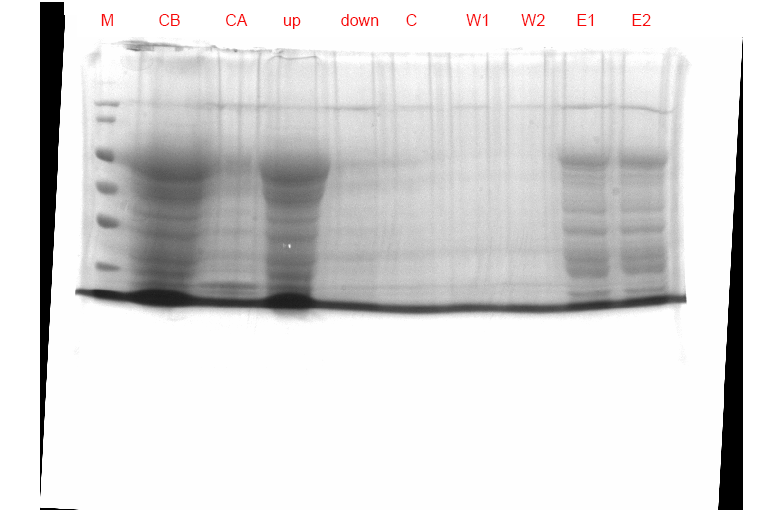


Fig.s8 original figure used in supplementary figure S5

M：marker；CA：bacterial lysate before IPTG induction；CB：bacterial lysate after IPTG induction；down：pellet after cell lysis and centrifugation；up：supernatant after cell lysis and centrifugation；C：flow-through from purification column；W1： first column wash buffer；W2：second column wash buffer；E1：first elution buffer of MBP-HcPUB30；E2：second elution buffer of MBP-HcPUB30.
